# Supplementary material for: Relaxor-like and switchable dielectric behavior in a rare noncentrosymmetric 3D iodoargentate hybrid
Source: Royal Society of Chemistry journal article supplement (doi:10.1039/c7ra11033b), 2017-01-01
Supplement: c7ra11033b1.pdf [file c7ra11033b1.pdf]

## **Relaxor-like and switchable dielectric behavior in a rare noncentrosymmetric 3D iodoargentates hybrid**

Shan-Shan Yu,<sup>a</sup> Shao-Xian Liu,<sup>a</sup> Hai-Bao Duan,<sup>\*a,b</sup> Yi-Xiao Zhu<sup>c</sup> and H. Zhang<sup>\*a</sup>

---

<sup>a</sup> *Key laboratory of Advanced Functional Materials of Nanjing, Nanjing Xiaozhuang University, Nanjing 211171, P. R. China.*

<sup>b</sup> *Department of Chemistry and Biochemistry, University of California, Los Angeles, California 90095-1569, United States.*

<sup>c</sup> *Nanjing Foreign Language School, Nanjing 210018, P. R. China.*

*Tel.: +86 25 86178274*

*Fax: +86 25 86178274*

*E-mail: duanhaibao4660@163.com*

## Preparation of **1**

KAgI<sub>2</sub> / DMF solution was prepared as follows: The N, N-dimethylformamide (DMF) solution of AgNO<sub>3</sub> was added to 20 ml of the saturated KI / DMF solution, and little precipitate was immediately formed and stirred until the mixture became the clear solution. Subsequently, a DMF solution of Cd (NO<sub>3</sub>)<sub>2</sub>•3H<sub>2</sub>O and 2 ml ethylenediamine were added into KAgI<sub>2</sub> / DMF solution. The resulting solution was kept at room temperature for two weeks, and white block crystals (**1**) were formed in ca. 90% yield based on Cd. Anal. Calcd for **1**: C, 7.23; H, 2.10; N, 8.35.

## Dielectric measurement

Temperature and frequency dependent dielectric permittivity and AC impedance measurements were carried out employing Concept 80 system (Novocontrol, Germany); the powdered pellet, with a thickness of ca. 0.52 mm, was coated by gold films on the opposite surfaces and sandwiched by the copper electrodes and the ac frequencies span from 1 Hz to 10<sup>7</sup> Hz.

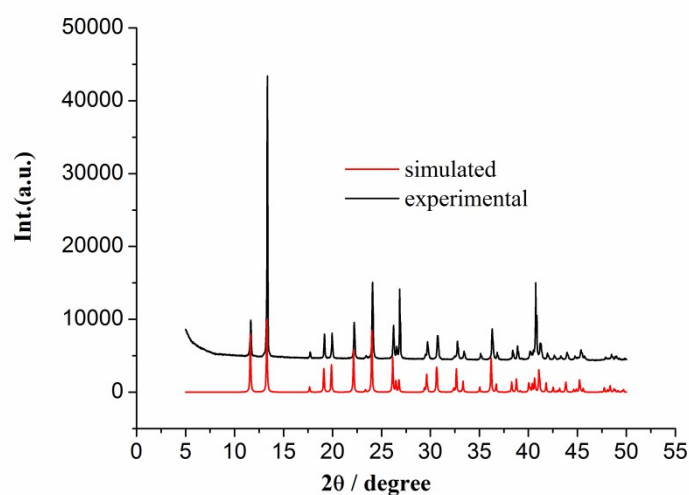

Figure S1 PXRD curve of **1** at room temperature (experimental and simulated profiles) which confirms the phase purity of the as-prepared sample.

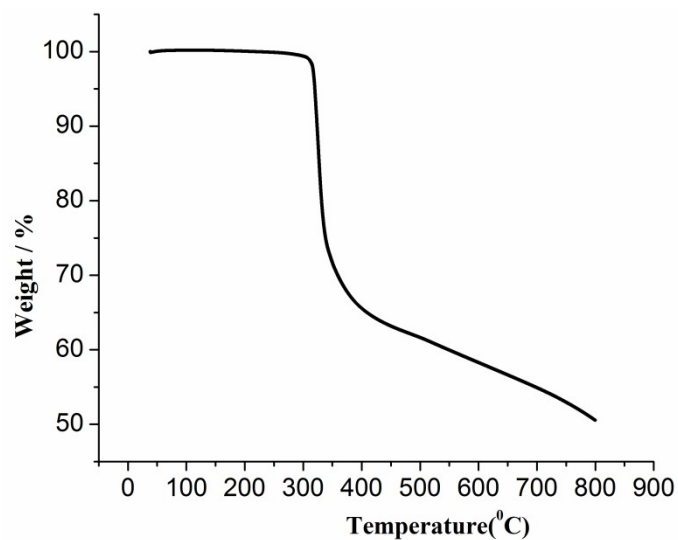

Figure S2 TG curve of **1**

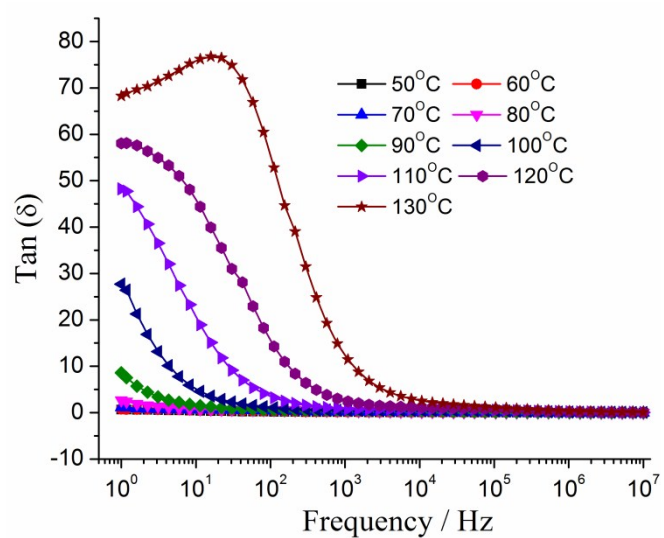

Figure S3 Frequency dependencies of the dielectric loss of **1** in the 50-130°C temperature range.

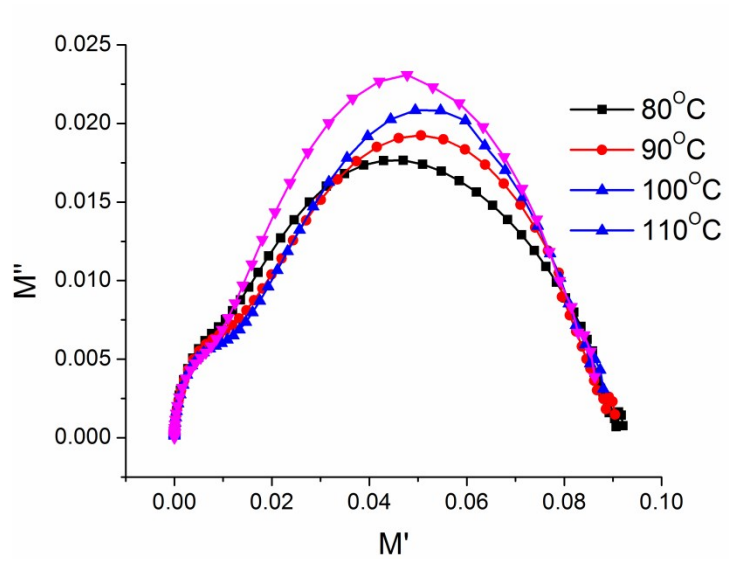

Figure S4 Complex modulus of **1** between 80 and 140 °C

(a)

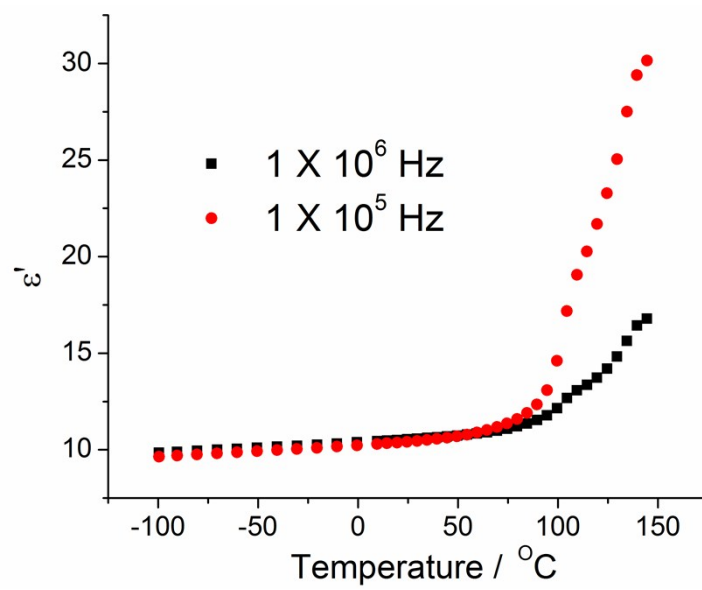

(b)

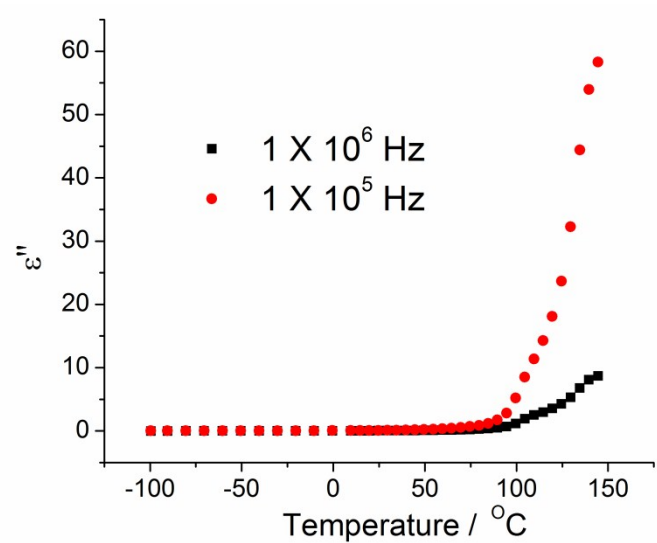

Figure S5 Temperature-dependent (a) real and (b) imaginary parts of dielectric permittivity at selected frequency.

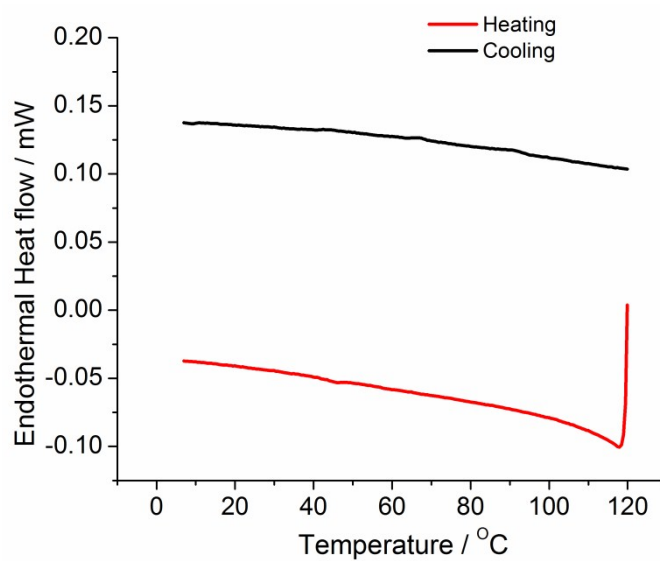

Figure S6 DSC curve of **1** at selected temperature range
